# Supplementary material for: Barriers and facilitators for implementation of a complex health services intervention in long-term care homes: a qualitative study using focus groups
Source: Springer Nature journal article supplement (doi:10.1186/s12877-021-02579-y), 2021-11-04
Supplement: MOESM1 [file 19829776]

## **CoCare interview guide for medical staff focus groups**

Attendees were asked to choose which of the following topics would be most relevant to the group before starting the interview process.

### ***Shared patient medical record / CoCare-Cockpit***

- 1) Did you use CoCare-Cockpit? If so: To what extent was it used?
- 2) What **benefits** did you experience in using CoCare-Cockpit?
- 3) What factors **facilitated** the use of CoCare-Cockpit?
- 4) What **barriers** did you need to overcome in using CoCare-Cockpit?
- 5) Is there anything you'd like to **add** regarding CoCare-Cockpit?

### ***Rounds***

- 6) What **changes** did you observe regarding rounds after project CoCare was implemented?
  - a) Were rounds **regularly scheduled** (preferably weekly)?
  - b) Did **organization** of rounds improve?
  - c) Were **responsibilities assigned clearly**?
- 7) What **benefits** did you experience with CoCare-rounds?
- 8) What **helped you** implement CoCare-rounds?
- 9) Which **barriers** did you have to overcome to implement CoCare-rounds?
- 10) Is there anything you'd like to **add** about CoCare-rounds?

### ***General practitioner teams***

- 11) How useful did you find the medical care provided by **GP-teams**?
- 12) Which factors **facilitated** the consolidation of GP-teams?
- 13) Which factors **impeded** the consolidation of GP-teams?
- 14) What are the **advantages/disadvantages** of GP-teams?
- 15) Is there anything you'd like to **add** about GP-teams?

### ***Medication checks***

- 16) Did you perform medication checks on a regular basis?
- 17) *If so:* What factors **facilitated** the implementation of medication checks? How **useful** did you find the medication checks?
- 18) *If not:* Why weren't regularly scheduled medication checks performed?

### ***Communication and collaboration doctors-nursing staff***

- 19) How did the **collaboration between doctors and nursing staff** change since project CoCare?
- 20) How did the **collaboration between doctors** change since project CoCare?
- 21) How did the **collaboration between general practitioners and specialists** change since project CoCare?
- 22) What factors of project CoCare **facilitated** collaboration?
- 23) What factors of project CoCare **impeded** collaboration?
- 24) Did you hold quarterly and yearly meetings?
- 25) *If so:* What factors **facilitated** the implementation of quarterly or yearly meetings? How would you rate the **usefulness** of those meetings?
- 26) *If not:* Why were no quarterly or yearly meetings held?

### ***Extended availability***

- 27) Was the availability of GPs by phone extended until at least 9 p.m. on weekdays?
- 28) *If so:* What factors **facilitated** the implementation of extended availability? How **useful** did you find the extended availability?
- 29) *If not:* Why was extended availability not implemented?

### ***Case conferences***

- 30) Were case conferences held, if applicable?
- 31) *If so:* What factors **facilitated** the implementation of case conferences? How **useful** did you find them?
- 32) *If not:* Why were no case conferences held?

### **Standard courses of treatment / Training courses**

- 33) How would you rate the off-site training for standard courses of treatment within the project?
- 34) Did you implement the CoCare-recommended standard courses of treatment at your facility?
- 35) *If so:* What factors **facilitated** the implementation of CoCare's standard courses of treatment? What **benefits** did you experience?
- 36) *If not:* Why were CoCare's standard courses of treatment not implemented?

*Please ask in each focus group interview (allow for approximately 20 min before ending the interview):*

#### **Overall assessment**

- Would you like for the CoCare-concept to be part of standard care in nursing homes?
- Which contextual factors would **facilitate**, which **impede** the implementation of the concept?
- What **benefits** do you see in implementing the concept?
- Did **medical care provided to residents** of the facility improve, e.g. by avoiding hospitalizations?
- What specific measures of CoCare were **especially important** and why?
- What **disadvantages** did you experience?
- What **modifications** would you make to the concept?
